# Supplementary material for: Can Alkyl Quaternary Ammonium Cations Substitute H2O2 in Controlling Cyanobacterial Blooms—Laboratory and Mesocosm Studies
Source: MDPI journal article supplement (doi:10.3390/microorganisms9112258), 2021-10-29
Supplement: s1 [file s1]

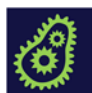

# Supplementary materials

**Table S1.** JIP test parameters with explanations and equation calculated using data extracted from the O-J-I-P fast Figure 1995.

|    | PJIP test parameters                                                                     | Explanation                                                                                                              |
|----|------------------------------------------------------------------------------------------|--------------------------------------------------------------------------------------------------------------------------|
| 1  | $F_o$                                                                                    | Minimum fluorescence intensity                                                                                           |
| 2  | $F_v/F_m = (F_m - F_o)/F_m$                                                              | maximum quantum yield of primary PSII photochemistry after dark adaptation                                               |
| 3  | $S_m = \text{Area}/(F_m - F_o)$                                                          | y-axis and the area between the fluorescence intensities ( $F = F_m$ )                                                   |
| 4  | $TR_o/CS_o = \varphi_{P_o} \cdot (ABS/CS_o)$                                             | Trapped energy flux per CS (at $t = 0$ )                                                                                 |
| 5  | $ET_o/CS_o = \varphi_{E_o} \cdot (ABS/CS_o)$                                             | Electron transport flux per CS (at $t = 0$ )                                                                             |
| 6  | $V_j = (F_{2ms} - F_o)/(F_m - F_o)$                                                      | Relative variable fluorescence intensity at the J-step, reflecting the open state of reaction centers                    |
| 7  | $M_o = 4 \cdot (F_{300\mu s} - F_o)/(F_m - F_o)$                                         | Approximated initial slope of the fluorescence transient, reflecting the maximum speed of $Q_A$ reduction                |
| 8  | $\varphi_{E_o} = ET_o/ABS = [1 - (F_o/F_m)] \cdot \Psi_o$                                | Quantum yield for electron transport (at $t = 0$ )                                                                       |
| 9  | $\Psi_o = ET_o/TR_o = (1 - V_j)$                                                         | Probability that a trapped excitation transfers an electron into the electron transport chain beyond $Q_A$ (at $t = 0$ ) |
| 10 | $DI_o/CS_o = ABS/CS_o - TR_o/CS_o$                                                       | Dissipated energy flux per CS (at $t = 0$ )                                                                              |
| 11 | $RC/CS_o = \varphi_{P_o} \cdot (V_j/M_o) \cdot (ABS/CS_o)$                               | Number of RCs per CS, reflecting density of RCs                                                                          |
| 12 | $ABS/RC = M_o \cdot (1/V_j) \cdot (1/\varphi_{P_o})$                                     | Absorption flux per reaction center (RC)                                                                                 |
| 13 | $ET_o/RC = M_o \cdot (1/V_j) \cdot \Psi_o$                                               | Electron transport flux per RC (at $t = 0$ )                                                                             |
| 14 | $DI_o/RC = ABS/RC - TR_o/RC$                                                             | Dissipated energy flux per RC (at $t = 0$ )                                                                              |
| 15 | $TR_o/RC = M_o \cdot (1/V_j)$                                                            | Trapped energy flux per RC (at $t = 0$ )                                                                                 |
| 16 | $RC/ABS = (1/M_o) \cdot \varphi_{P_o} \cdot V_j$                                         | Density of RCs based on absorbed energy                                                                                  |
| 17 | $PIABS = (RC/ABS) \cdot [\varphi_{P_o}/(1 - \varphi_{P_o})] \cdot [\Psi_o/(1 - \Psi_o)]$ | Performance index based on absorption of light energy                                                                    |
| 18 | $\Phi(P_o)$                                                                              | Maximum photochemical efficiency                                                                                         |
| 19 | $ABS/CS_o = M_o \cdot (1/V_j) \cdot (1/\varphi_{P_o})$                                   | Absorption flux per reaction center (RC)                                                                                 |
| 20 | $DI_o/CS_o = ABS/CS_o - TR_o/CS_o$                                                       | Dissipated energy flux per CS (at $t = 0$ )                                                                              |
| 21 | $RE_o/CS_o$                                                                              | Energy transferred to the end of the electron transfer chain per CS ( $t=0$ )                                            |

**Table S2.** PerMANOVA assessment of the differences in total phytoplankton, Chlorophyte, and Diatom communities between every two treatments based on biomass during the 28 days experiment.

|                                        | total phytoplankton |         | chlorophyte    |         | diatom         |         |
|----------------------------------------|---------------------|---------|----------------|---------|----------------|---------|
| pairs                                  | R <sup>2</sup>      | P value | R <sup>2</sup> | P value | R <sup>2</sup> | P value |
| ODTMA vs H <sub>2</sub> O <sub>2</sub> | 0.0435              | 0.183   | 0.0745         | 0.003*  | 0.0700         | 0.009*  |
| ODTMA vs Ctrl                          | 0.0931              | 0.009*  | 0.0366         | 0.207   | 0.0729         | 0.021*  |
| H <sub>2</sub> O <sub>2</sub> vs Ctrl  | 0.0863              | 0.042*  | 0.0509         | 0.027*  | 0.1256         | 0.003*  |

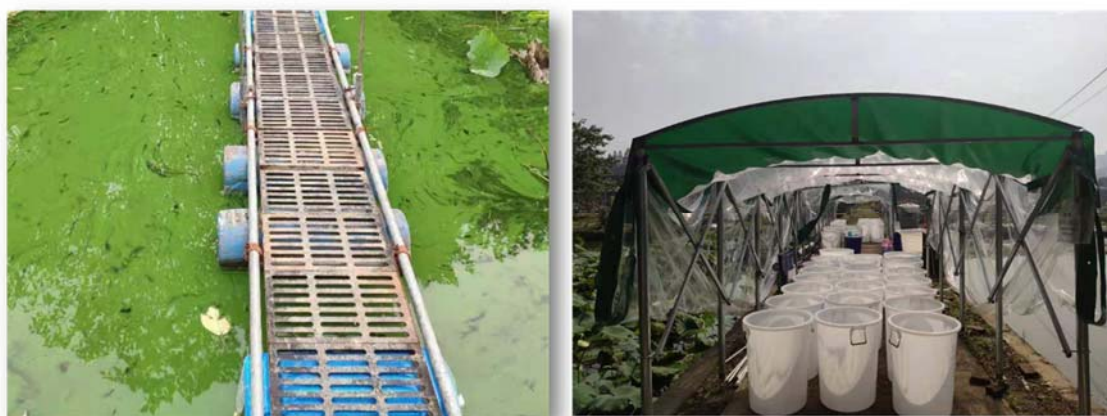

**Figure S1.** Photos of the fish pond where *Microcystis* spp. colonies were collected and site of the mesocosm experiment. The geographic location is 30.53N 114.40E.

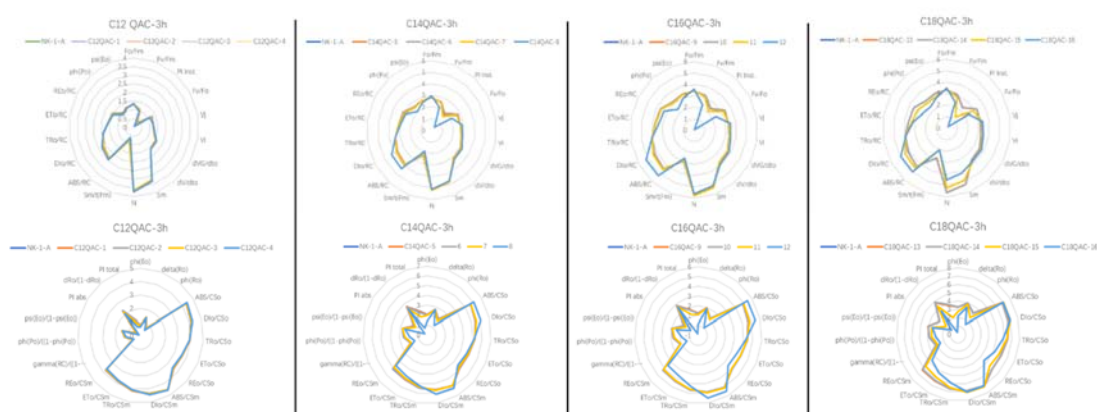

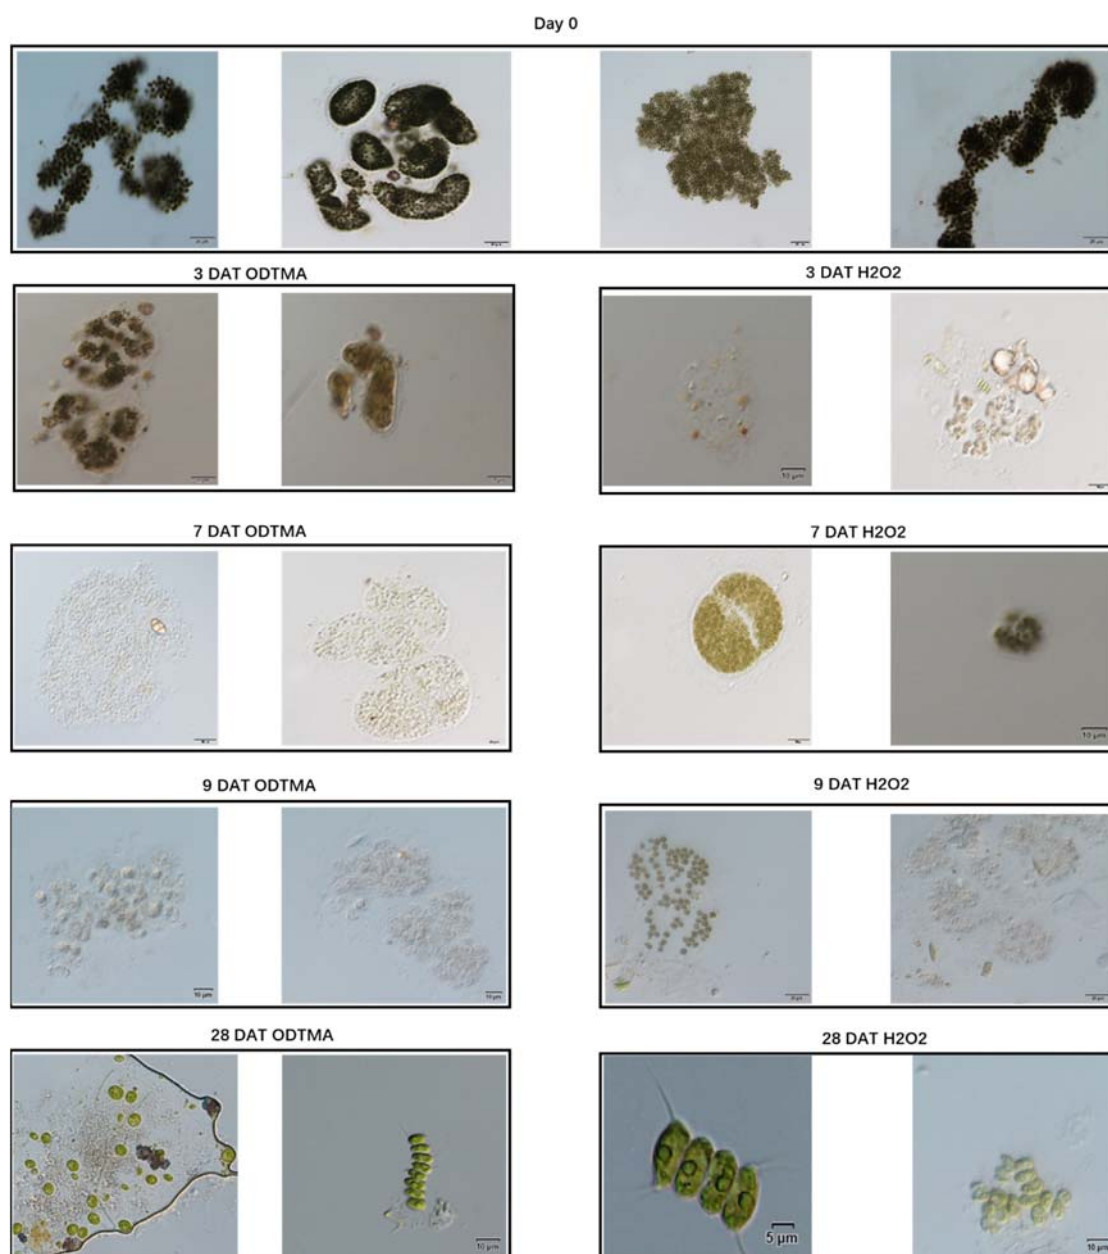

**Figure S3.** ODTMA and H<sub>2</sub>O<sub>2</sub> impose morphological and physiological changes in *Microcystis* colonies.

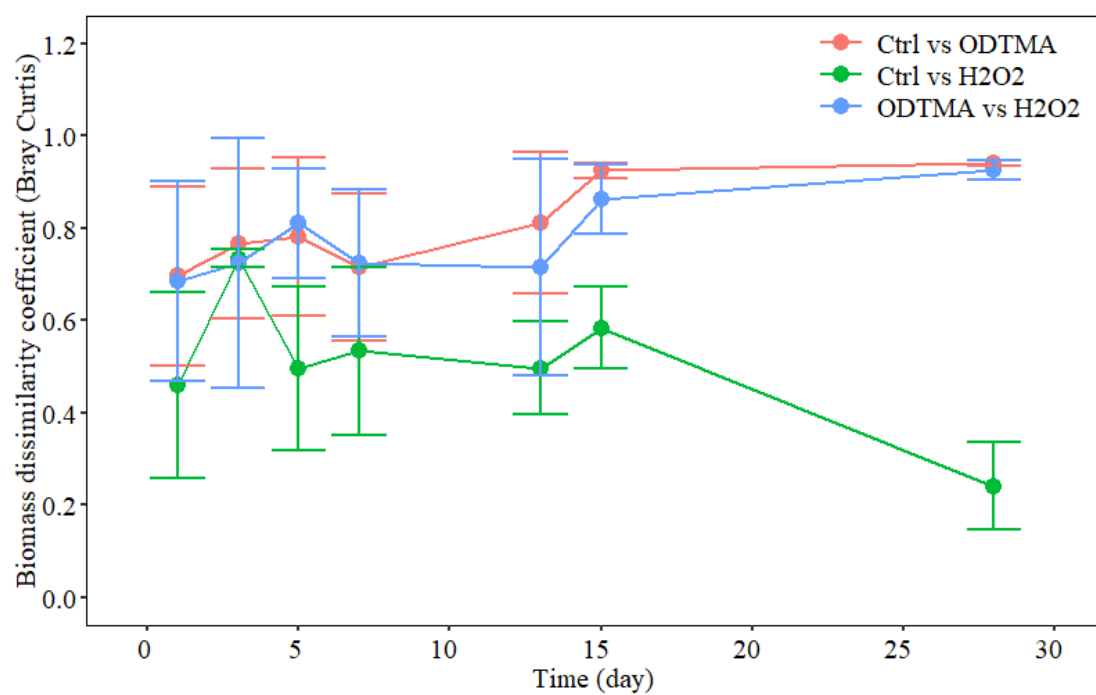

**Figure S4.** Bray-Curtis distance and Metric multidimensional scaling analyses between the control, ODTMA, and H2O2 groups. Dissimilarity coefficients (a value greater than 0.4 indicates that there was a difference in species composition between the two treatments).
